# Supplementary material for: Insights into the Genetic Evolution of Duck Hepatitis A Virus in Egypt
Source: MDPI journal article supplement (doi:10.3390/ani11092741), 2021-09-19
Supplement: s1 [file s1]

Table S1. Histopathologic lesion scores in the different DHAV-1 isolates reported in this study.

| Histopathological lesion             | Normal control | DHA virus 1 strain Egypt-14/2019 | DHA virus 1 strain Egypt-1/2018 | DHA virus 1 strain Egypt-10/2019 | DHA virus 1 strain Egypt-13/2020 | A virus 1 strain Egypt-4/2020 |
|--------------------------------------|----------------|----------------------------------|---------------------------------|----------------------------------|----------------------------------|-------------------------------|
| Congestion of central vein           | 0.0 ± 0.0      | 2.6 ± 0.5                        | 2.2 ± 0.4                       | 3 ± 0.0                          | 1.6 ± 0.5                        | 1.4 ± 0.5                     |
| Hemorrhage                           | 0.0 ± 0.0      | 1.4 ± 0.5                        | 0.6 ± 0.5                       | 2.6 ± 0.5                        | 1.2 ± 0.4                        | 1.6 ± 0.5                     |
| Vacuolar degeneration of hepatocytes | 0.0 ± 0.0      | 2.6 ± 0.5                        | 2.2 ± 0.4                       | 3 ± 0.0                          | 2.2 ± 0.4                        | 2.4 ± 0.5                     |
| Hepatocellular apoptosis             | 0.0 ± 0.0      | 2.4 ± 0.54                       | 2.4 ± 0.5                       | 3 ± 0.0                          | 2.2 ± 0.8                        | 1.6 ± 0.5                     |
| Inflammatory cells infiltration      | 0.0 ± 0.0      | 1.4 ± 0.5                        | 1.6 ± 0.5                       | 2.8 ± 0.4                        | 2 ± 0.7                          | 1.6 ± 0.5                     |

Data shown as mean ± SD. One-way analysis of variance was used for data analysis, significantly different ( $p < 0.05$ ).
