# Supplementary material for: Insights into the Genetic Evolution of Duck Hepatitis A Virus in Egypt
Source: Animals (Basel). 2021 Sep 19;11(9):2741. doi: 10.3390/ani11092741 (PMC8472559; doi:10.3390/ani11092741)
Supplement: Supplementary file 1 [file animals-11-02741-s001.zip]

Archive with 6 entries (6 files):
- Suplementary figure S1_amino acids mutation VP1.tif
- Suplementary figure S2_3D comparison with complete genome.tif
- Suplementary figure S3_5 UTR comparison with complete genome.tif
- Suplementary figure S4_VP1 comparison with complete genome.tif
- Suplementary figure S5_Phylogeny to confirm the recombination_Final_ 2 trees.tif
- Table S1 lesion scores.pdf
